# Supplementary material
Source: publisher site journal article supplement (https://www.dovepress.com/article/578286)
Supplement: Supplementary file 1 [file 578286-Supplementary%20material.docx]

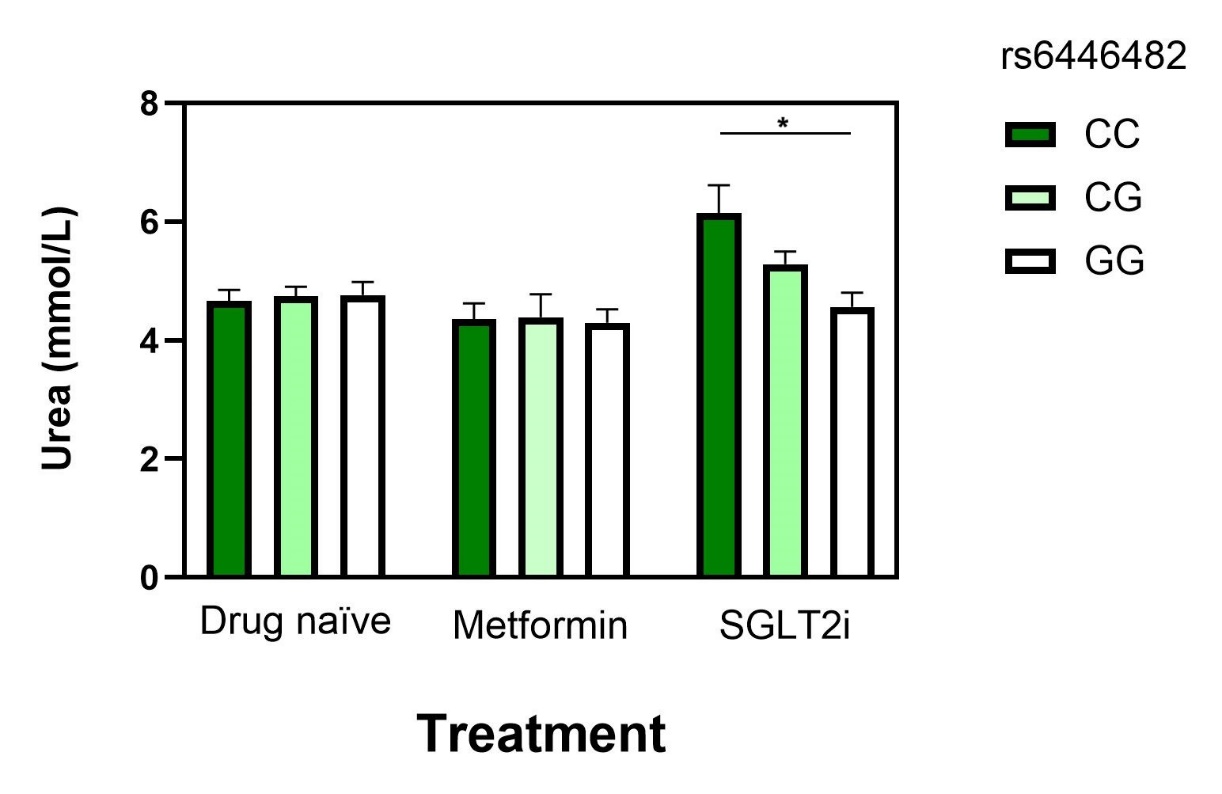

**Supplementary Figure S1**. Serum urea levels (mmol/L) are shown across the three treatment groups: drug-naïve, metformin-treated, and SGLT2i-treated. Within each group, data are further stratified by the rs6446482 genotype (CC, CG, GG). Data are presented as mean ± SEM. *p < 0.01 for post-hoc comparisons between genotype groups within the SGLT2i cohort after one-way ANOVA.

**Supplementary table S1**. List of the genetic variants investigated in this study.

| **Gene** | **Variant** |
| --- | --- |
| *SLC5A2* | rs3813008 |
| rs4536493 |
| rs9934336 |
| rs3116150 |
| rs9927250 |
| rs34081766 |
| rs3116150 |
| rs11646054 |
| rs3813008 |
| *SLC5A4* | rs62239058 |
| *SLC5A9* | rs850763 |
| *SLC2A1* | rs1385129 |
| *SLC2A9* | rs1689079 |
| *WFS1* | rs10010131 |
| *UGT2B4* | rs1080755 |
| *UGT1A9* | rs72551330 |

**Supplementary table S2**. Clinical and biochemical characteristics of SGLT2i-treated patients stratified by rs10010131 genotype.

| **Variable** | **AA**  **N=17** | **AG**  **N=33** | **GG**  **N=19** | **AA vs AG**  **FDR** | **AA vs GG**  **FDR** |
| --- | --- | --- | --- | --- | --- |
| **Fasting blood glucose (mmol/L)** | 6.65 (6.05-9.68) | 7.7 (6.5-9.4) | 7.6 (4.6-9.2) | 0.32 | 0.33 |
| **HbA1C (%)** | 8.2 (1.5) | 7.7 (1.1) | 7.8 (1.2) | 0.7 | 0.9 |
| **Total cholesterol (mmol/L)** | 4.34 (1.03) | 4.78 (0.89) | 4.46 (0.89) | 0.3 | 0.9 |
| **HDL-cholesterol (mmol/L)** | 1.42 (0.36) | 1.37 (0.42) | 1.22 (0.26) | 0.9 | 0.35 |
| **LDL-cholesterol (mmol/L)** | 2.28 (0.86) | 2.71 (0.86) | 2.35 (0.84) | 0.3 | 0.9 |
| **Triglyceride (mmol/L)** | 1.41 (0.6) | 1.59 (1.0) | 1.97 (1.5) | 0.9 | 0.44 |
| **Creatinine (µmol/L)** | 74.4 (22.8) | 63.3 (13.9) | 65.4 (17.3) | 0.1 | 0.37 |
| **Uric acid** | 290.9 (92.3) | 243.7 (66.1) | 243.4 (56.6) | 0.09 | 0.15 |
| **Calcium** | 2.41 (0.07) | 2.41 (0.09) | 2.38 (0.09) | 0.9 | 0.9 |
| **Hematocrit** | 43.06 (5.36) | 42.39 (3.87) | 41.21 (4.88) | 0.9 | 0.7 |
